# Supplementary material for: Recent and forecasted increases in coccidioidomycosis incidence in California linked to hydroclimatic swings
Source: PubMed Central journal article supplement — medRxiv. 2024 Aug 31:2024.08.30.24312858. Preprint. [Version 1] doi: 10.1101/2024.08.30.24312858 (PMC11383451; doi:10.1101/2024.08.30.24312858), 2024-08-31
Supplement: NIHPP2024.08.30.24312858v1-supplement-1.pdf [file NIHPP2024.08.30.24312858v1-supplement-1.pdf]

## Supplemental Tables and Figures

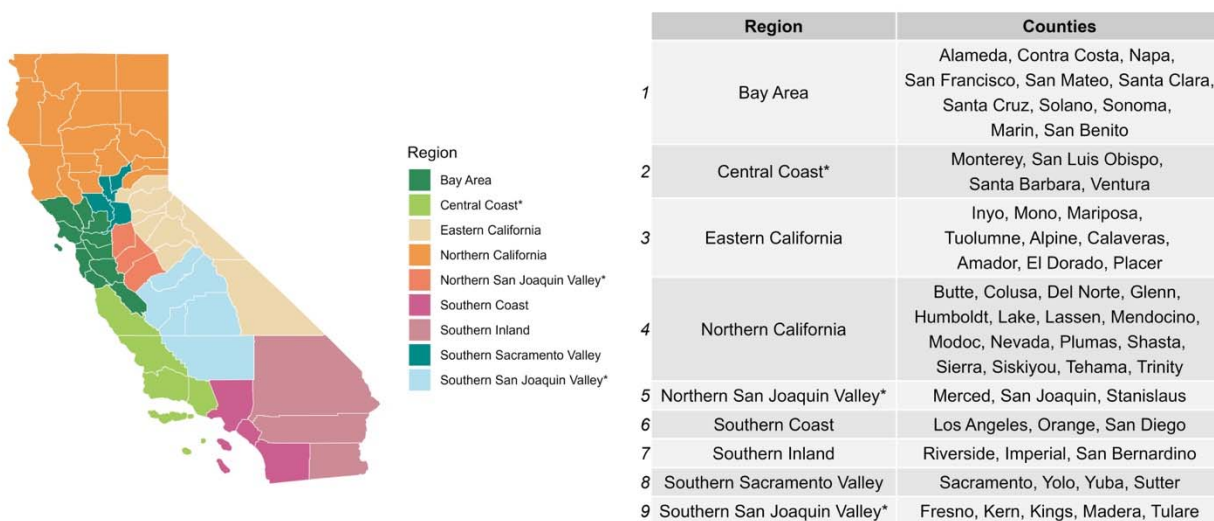

**Fig. S1.** Map of California counties by region. Starred regions are considered “high incidence”; counties within these regions were modelled independently.

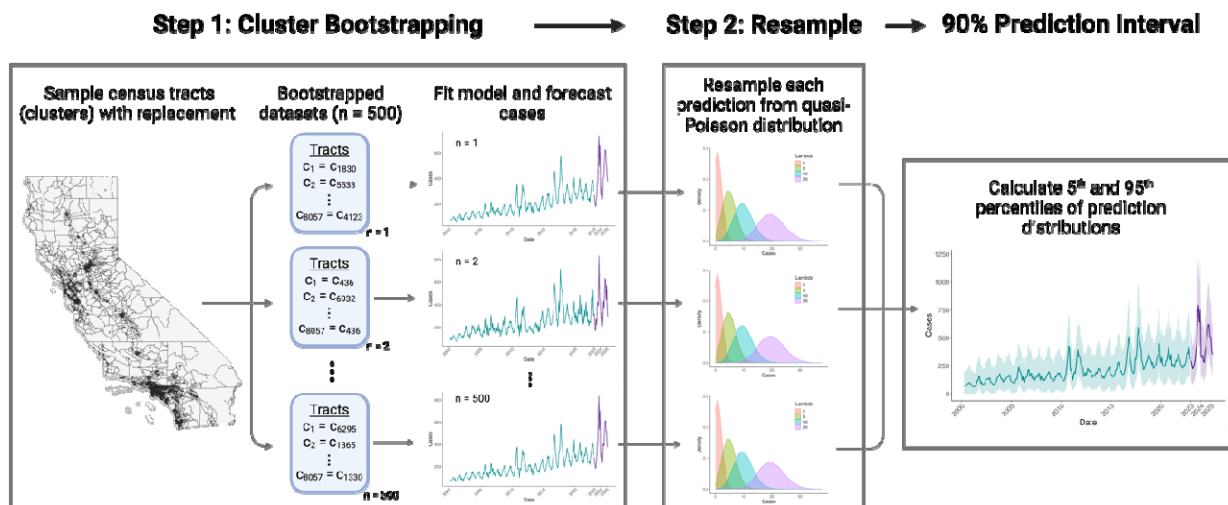

**Fig. S2.** To generate 90% prediction intervals, we used a two-step bootstrapping process. In step 1, we sampled census tracts ( $n = 8,057$ ) with replacement to generate 500 datasets, fit the models to each dataset ( $n = 1-500$ ), and forecasted cases using each model. In step 2, we then resampled each estimate from a quasi-Poisson distribution with the mean set to each bootstrapped prediction and calculated the 5<sup>th</sup> and 95<sup>th</sup> percentile of the resulting distribution to obtain the 90% prediction interval. Figure created with BioRender.

**Table S1.** Variables included in the five models included in the ensemble. Green cells were used as main effects and purple cells were used as interactions. Models 1-4 were generalized linear models (GLMs) and model 5 was a random forest (RF).

| Variable                           | GLM 1         | GLM 2 | GLM 3 | GLM 4         | RF    |
|------------------------------------|---------------|-------|-------|---------------|-------|
| Population (as an offset)          | Green         | Green | Green | Green         | Green |
| Year (as a natural spline)         | Green         | Green | Green | Green         | Green |
| Season (as a factor)               | Green         | Green | Green | Green, Purple | Green |
| Percent sand                       | Green         | Green | Green | Green         | Green |
| Impervious surface                 | Green         | Green | Green | Green         | Green |
| Elevation                          | Green         | Green | Green | Green         | Green |
| Total rainfall                     | Green         | Green | Green | Green         | Green |
| Lag 1 month                        | Green         | Green | Green | Green         | Green |
| Lag 3 month                        | Green, Purple | Green | Green | Green, Purple | Green |
| Lag 6 month                        | Green, Purple | Green | Green | Green, Purple | Green |
| Lag 9 month                        | Green, Purple | Green | Green | Green, Purple | Green |
| Lag 12 month                       | Green, Purple | Green | Green | Green, Purple | Green |
| Lag 15 month                       | Green         | Green | Green | Green         | Green |
| Lag 18 month                       | Green         | Green | Green | Green         | Green |
| Lag 21 month                       | Green         | Green | Green | Green, Purple | Green |
| Lag 24 month                       | Green         | Green | Green | Green, Purple | Green |
| Lag 27 month                       | Green         | Green | Green | Green         | Green |
| Lag 30 month                       | Green         | Green | Green | Green         | Green |
| Lag 33 month                       | Green         | Green | Green | Green         | Green |
| Lag 36 month                       | Green         | Green | Green | Green, Purple | Green |
| Average Temperature                | Green         | Green | Green | Green         | Green |
| Lag 1 month                        | Green         | Green | Green | Green         | Green |
| Lag 3 month                        | Green         | Green | Green | Green, Purple | Green |
| Lag 6 month                        | Green         | Green | Green | Green, Purple | Green |
| Lag 9 month                        | Green         | Green | Green | Green, Purple | Green |
| Lag 12 month                       | Green         | Green | Green | Green, Purple | Green |
| Lag 15 month                       | Green         | Green | Green | Green         | Green |
| Lag 18 month                       | Green         | Green | Green | Green         | Green |
| Lag 21 month                       | Green         | Green | Green | Green         | Green |
| Lag 24 month                       | Green         | Green | Green | Green         | Green |
| Lag 27 month                       | Green         | Green | Green | Green         | Green |
| Lag 30 month                       | Green         | Green | Green | Green         | Green |
| Lag 33 month                       | Green         | Green | Green | Green         | Green |
| Lag 36 month                       | Green         | Green | Green | Green         | Green |
| One year post drought (indicator)  | Green, Purple | Green | Green | Green         | Green |
| Two years post drought (indicator) | Green, Purple | Green | Green | Green         | Green |
